# Supplementary material for: Metallothionein I/II Expression and Metal Ion Levels in Correlation with Amyloid Beta Deposits in the Aged Feline Brain
Source: MDPI journal article supplement (doi:10.3390/brainsci13071115), 2023-07-22
Supplement: s1 [file s1]

## Supplementary materials

**Table S1.** Histopathological scoring of age-related brain lesions in mature, senior, and geriatric cats.

| Case No | Neuronophagia           | Satellitosis        | Chromatolysis             | Neuron lipofuscin deposits | Neuronal vacuolation    | Neuronal necrosis and loss | Microglial lipofuscin deposits | Perivascular microglia | Spheroids                    | Lafora like bodies | H-E positive bodies |
|---------|-------------------------|---------------------|---------------------------|----------------------------|-------------------------|----------------------------|--------------------------------|------------------------|------------------------------|--------------------|---------------------|
| 4       | 1                       | 1                   | 1                         | 2                          | 0                       | 2                          | 1                              | 1                      | 1                            | 1                  | 0                   |
| 5       | 2                       | 3                   | 2                         | 1                          | 1                       | 2                          | 1                              | 1                      | 0                            | 1                  | 0                   |
| 6       | 1                       | 2                   | 2                         | 2                          | 1                       | 1                          | 2                              | 1                      | 2                            | 2                  | 1                   |
| 7       | 1                       | 1                   | 1                         | 1                          | 1                       | 1                          | 1                              | 1                      | 0                            | 1                  | 0                   |
| 8       | 1                       | 1                   | 1                         | 1                          | 0                       | 1                          | 1                              | 1                      | 0                            | 1                  | 0                   |
| 9       | 1                       | 1                   | 1                         | 2                          | 0                       | 1                          | 2                              | 1                      | 0                            | 1                  | 1                   |
| 10      | 1                       | 1                   | 1                         | 2                          | 0                       | 1                          | 1                              | 1                      | 0                            | 2                  | 0                   |
| 11      | 1                       | 1                   | 1                         | 2                          | 0                       | 1                          | 1                              | 1                      | 1                            | 1                  | 1                   |
| 12      | 1                       | 2                   | 2                         | 1                          | 1                       | 1                          | 1                              | 1                      | 0                            | 2                  | 2                   |
| 13      | 1                       | 1                   | 2                         | 2                          | 0                       | 1                          | 1                              | 1                      | 0                            | 1                  | 0                   |
| 14      | 1                       | 1                   | 1                         | 2                          | 0                       | 1                          | 1                              | 1                      | 0                            | 1                  | 0                   |
| 15      | 1                       | 1                   | 1                         | 1                          | 0                       | 1                          | 1                              | 1                      | 0                            | 0                  | 1                   |
| 16      | 1                       | 1                   | 1                         | 3                          | 0                       | 2                          | 1                              | 1                      | 0                            | 1                  | 2                   |
| 17      | 1                       | 2                   | 2                         | 2                          | 1                       | 2                          | 2                              | 1                      | 0                            | 1                  | 0                   |
| 18      | 1                       | 1                   | 2                         | 1                          | 0                       | 2                          | 2                              | 1                      | 0                            | 2                  | 0                   |
| 19      | 1                       | 2                   | 2                         | 2                          | 0                       | 1                          | 2                              | 1                      | 0                            | 1                  | 0                   |
| 20      | 2                       | 2                   | 2                         | 3                          | 0                       | 2                          | 2                              | 2                      | 1                            | 3                  | 0                   |
| 21      | 2                       | 2                   | 2                         | 3                          | 0                       | 2                          | 3                              | 2                      | 0                            | 2                  | 0                   |
| 22      | 1                       | 1                   | 2                         | 2                          | 0                       | 1                          | 2                              | 1                      | 0                            | 1                  | 0                   |
| 23      | 3                       | 3                   | 3                         | 3                          | 2                       | 3                          | 3                              | 3                      | 0                            | 2                  | 2                   |
| 24      | 3                       | 3                   | 3                         | 3                          | 2                       | 3                          | 3                              | 3                      | 2                            | 2                  | 1                   |
| 25      | 2                       | 2                   | 2                         | 3                          | 1                       | 2                          | 2                              | 2                      | 0                            | 3                  | 1                   |
| 26      | 3                       | 3                   | 3                         | 3                          | 1                       | 2                          | 3                              | 2                      | 0                            | 2                  | 1                   |
| 27      | 3                       | 3                   | 3                         | 3                          | 0                       | 2                          | 3                              | 2                      | 0                            | 3                  | 2                   |
| 28      | 2                       | 2                   | 2                         | 3                          | 0                       | 2                          | 3                              | 1                      | 0                            | 2                  | 1                   |
| 29      | 2                       | 2                   | 2                         | 2                          | 0                       | 2                          | 2                              | 1                      | 1                            | 1                  | 2                   |
| 30      | 2                       | 2                   | 2                         | 3                          | 0                       | 2                          | 3                              | 1                      | 2                            | 2                  | 1                   |
| Case No | Neuraxonal degeneration | WM & GM vacuolation | GM&WM vascular hyalinosis | GM&WM vascular fibrosis    | Leptomeningeal fibrosis | LV fibrosis                | LV hyalinosis                  | LV calcification       | CPV & CP epithelial fibrosis | CPV hyalinosis     | Hemorrhages         |
| 4       | 1                       | 2                   | 1                         | 1                          | 1                       | 2                          | 0                              | 0                      | 2                            | 0                  | 0                   |
| 5       | 2                       | 3                   | 1                         | 1                          | 2                       | 2                          | 0                              | 0                      | 1                            | 0                  | 0                   |
| 6       | 2                       | 1                   | 0                         | 0                          | 1                       | 2                          | 0                              | 0                      | 1                            | 0                  | 0                   |
| 7       | 1                       | 1                   | 0                         | 0                          | 0                       | 0                          | 0                              | 0                      | 0                            | 0                  | 0                   |
| 8       | 1                       | 2                   | 0                         | 0                          | 0                       | 0                          | 0                              | 0                      | 0                            | 0                  | 0                   |
| 9       | 1                       | 1                   | 0                         | 1                          | 1                       | 1                          | 0                              | 0                      | 1                            | 0                  | 1                   |
| 10      | 1                       | 1                   | 0                         | 0                          | 0                       | 0                          | 0                              | 0                      | 0                            | 0                  | 0                   |
| 11      | 1                       | 1                   | 0                         | 0                          | 0                       | 0                          | 0                              | 0                      | 1                            | 0                  | 1                   |
| 12      | 1                       | 1                   | 0                         | 0                          | 1                       | 1                          | 0                              | 1                      | 1                            | 0                  | 1                   |
| 13      | 1                       | 2                   | 0                         | 0                          | 1                       | 1                          | 0                              | 1                      | 1                            | 0                  | 0                   |
| 14      | 1                       | 1                   | 0                         | 1                          | 1                       | 1                          | 0                              | 1                      | 1                            | 0                  | 0                   |
| 15      | 1                       | 1                   | 0                         | 0                          | 1                       | 1                          | 0                              | 0                      | 1                            | 0                  | 0                   |
| 16      | 1                       | 2                   | 1                         | 1                          | 2                       | 2                          | 0                              | 0                      | 2                            | 0                  | 0                   |
| 17      | 1                       | 1                   | 1                         | 1                          | 1                       | 2                          | 0                              | 0                      | 1                            | 0                  | 0                   |
| 18      | 2                       | 1                   | 0                         | 1                          | 1                       | 2                          | 0                              | 0                      | 2                            | 1                  | 0                   |
| 19      | 1                       | 1                   | 0                         | 0                          | 2                       | 2                          | 0                              | 1                      | 3                            | 0                  | 0                   |
| 20      | 2                       | 2                   | 0                         | 1                          | 2                       | 2                          | 0                              | 0                      | 2                            | 0                  | 0                   |
| 21      | 2                       | 2                   | 1                         | 1                          | 2                       | 2                          | 1                              | 1                      | 3                            | 1                  | 0                   |
| 22      | 1                       | 1                   | 1                         | 0                          | 1                       | 1                          | 0                              | 0                      | 1                            | 0                  | 0                   |
| 23      | 3                       | 3                   | 2                         | 1                          | 3                       | 3                          | 2                              | 0                      | 3                            | 1                  | 0                   |
| 24      | 3                       | 3                   | 2                         | 1                          | 3                       | 3                          | 2                              | 1                      | 3                            | 0                  | 1                   |
| 25      | 3                       | 3                   | 1                         | 0                          | 1                       | 2                          | 1                              | 1                      | 3                            | 0                  | 0                   |
| 26      | 3                       | 2                   | 1                         | 0                          | 3                       | 3                          | 0                              | 0                      | 2                            | 0                  | 1                   |
| 27      | 3                       | 2                   | 1                         | 1                          | 3                       | 2                          | 0                              | 0                      | 3                            | 0                  | 0                   |
| 28      | 3                       | 2                   | 0                         | 1                          | 2                       | 2                          | 0                              | 0                      | 2                            | 0                  | 0                   |
| 29      | 2                       | 2                   | 1                         | 1                          | 2                       | 2                          | 0                              | 0                      | 2                            | 1                  | 0                   |
| 30      | 2                       | 1                   | 0                         | 1                          | 2                       | 2                          | 0                              | 0                      | 3                            | 1                  | 1                   |

**Table S2.** Iron deposition scoring in the brain of the aged cats.

|                 | <i>Temporal lobe</i> |              |          | <i>Hippocampus</i> |          | <i>Thalamus</i> |          | <i>Striatum</i> |         | <i>Frontal lobe</i> |              |          | <i>Cerebellum</i> |                 |          |
|-----------------|----------------------|--------------|----------|--------------------|----------|-----------------|----------|-----------------|---------|---------------------|--------------|----------|-------------------|-----------------|----------|
| <i>Case No.</i> | GM&WM<br>cells       | GM&WM<br>IPs | WM<br>MF | Hipp<br>cells      | Hipp IPs | Thal<br>cells   | Thal IPs | Str<br>cells    | Str IPs | GM&WM<br>cells      | GM&WM<br>IPs | WM<br>MF | GM&WM&DN<br>cells | GM&WM&DN<br>IPs | WM<br>MF |
| 1 <sup>a</sup>  | 1                    | 2            | 0        | 3                  | 0        | 1               | 1        | 0               | 1       | 1                   | 1            | 0        | 1                 | 1               | 0        |
| 2 <sup>a</sup>  | 2                    | 1            | 0        | 1                  | 1        | 1               | 1        | 0               | 1       | 0                   | 1            | 0        | 1                 | 2               | 1        |
| 3 <sup>a</sup>  | 1                    | 1            | 0        | 1                  | 0        | 1               | 1        | 0               | 0       | 1                   | 1            | 0        | 1                 | 0               | 0        |
| 4               | 1                    | 2            | 0        | 1                  | 1        | 1               | 1        | 0               | 1       | 1                   | 2            | 0        | 2                 | 3               | 1        |
| 5               | 2                    | 1            | 0        | 3                  | 0        | 1               | 1        | 2               | 1       | 2                   | 0            | 0        | 2                 | 1               | 2        |
| 6               | 3                    | 2            | 3        | 3                  | 1        | 1               | 2        | 1               | 1       | 3                   | 3            | 2        | 3                 | 2               | 1        |
| 7               | 1                    | 1            | 0        | 1                  | 1        | 1               | 1        | 1               | 1       | 1                   | 1            | 1        | 1                 | 2               | 1        |
| 8               | 0                    | 1            | 0        | 1                  | 0        | 0               | 1        | 0               | 1       | 1                   | 1            | 1        | 1                 | 1               | 0        |
| 9               | 2                    | 3            | 1        | 3                  | 2        | 1               | 2        | 1               | 1       | 1                   | 0            | 0        | 2                 | 3               | 2        |
| 10              | 0                    | 1            | 0        | 0                  | 1        | 0               | 1        | 0               | 1       | 0                   | 1            | 0        | 1                 | 1               | 0        |
| 11              | 1                    | 1            | 1        | 1                  | 1        | 0               | 1        | 1               | 1       | 1                   | 1            | 1        | 1                 | 2               | 2        |
| 12              | 0                    | 2            | 0        | 1                  | 1        | 1               | 1        | 0               | 0       | 1                   | 1            | 1        | 1                 | 1               | 1        |
| 13              | 1                    | 2            | 1        | 1                  | 1        | 1               | 1        | 0               | 0       | 1                   | 1            | 0        | 1                 | 1               | 0        |
| 14              | 1                    | 2            | 1        | 1                  | 1        | 1               | 2        | 1               | 1       | 1                   | 2            | 2        | 1                 | 1               | 1        |
| 15              | 0                    | 1            | 1        | 1                  | 1        | 0               | 2        | 0               | 1       | 0                   | 1            | 1        | 1                 | 1               | 1        |
| 16              | 1                    | 1            | 0        | 1                  | 1        | 1               | 1        | 0               | 1       | 1                   | 2            | 0        | 2                 | 3               | 1        |
| 17              | 1                    | 2            | 2        | 1                  | 1        | 1               | 2        | 0               | 1       | 0                   | 1            | 0        | 0                 | 2               | 0        |
| 18              | 1                    | 2            | 1        | 1                  | 1        | 1               | 1        | 1               | 1       | 1                   | 1            | 0        | 1                 | 3               | 1        |
| 19              | 1                    | 3            | 0        | 1                  | 2        | 1               | 3        | 1               | 1       | 1                   | 2            | 2        | 2                 | 2               | 1        |
| 20              | 1                    | 1            | 0        | 2                  | 1        | 1               | 1        | 1               | 0       | 2                   | 2            | 1        | 2                 | 3               | 2        |
| 21              | 3                    | 3            | 3        | 3                  | 2        | 1               | 3        | 1               | 1       | 1                   | 1            | 1        | 2                 | 2               | 3        |
| 22              | 1                    | 1            | 3        | 1                  | 0        | 0               | 1        | 0               | 0       | 1                   | 1            | 1        | 1                 | 1               | 1        |
| 23              | 2                    | 2            | 1        | 1                  | 1        | 3               | 1        | 1               | 0       | 2                   | 2            | 2        | 1                 | 1               | 3        |
| 24              | 2                    | 2            | 1        | 3                  | 1        | 1               | 2        | 1               | 2       | 2                   | 2            | 0        | 1                 | 3               | 3        |
| 25              | 2                    | 3            | 2        | 2                  | 2        | 1               | 3        | 1               | 1       | 1                   | 3            | 2        | 3                 | 2               | 3        |
| 26              | 3                    | 3            | 3        | 2                  | 1        | 1               | 3        | 1               | 1       | 1                   | 2            | 3        | 3                 | 1               | 3        |
| 27              | 3                    | 3            | 3        | 3                  | 3        | 1               | 3        | 2               | 1       | 2                   | 2            | 3        | 2                 | 3               | 3        |
| 28              | 1                    | 2            | 1        | 1                  | 1        | 1               | 3        | 0               | 1       | 1                   | 1            | 2        | 1                 | 3               | 2        |
| 29              | 1                    | 1            | 0        | 2                  | 1        | 1               | 2        | 0               | 1       | 1                   | 3            | 1        | 2                 | 1               | 3        |
| 30              | 0                    | 3            | 0        | 1                  | 1        | 2               | 3        | 0               | 1       | 1                   | 3            | 1        | 2                 | 2               | 3        |

\* **ves:** vessels; **Hip:** hippocampus; **Thal:** thalamus; **Str:** striatum; **MF:** myelinated fibers; **DN:** dentate nucleus

**Table S3.** Scoring of MT-I/II immunolabelling in cats of different ages

|                | Temporal lobe |    |    | Hippocampus |         |         |         | Thalamus |          | Striatum |         | Frontal lobe |    |    |    | Choroid plexus |       |    | Ependyma |           |
|----------------|---------------|----|----|-------------|---------|---------|---------|----------|----------|----------|---------|--------------|----|----|----|----------------|-------|----|----------|-----------|
| Case No.       | GM            | WM | LV | GM&WM       | Hlip GM | Hlip WM | Hip_ves | Thal     | Thal ves | Str      | Str_ves | IC           | GM | WM | LC | LV             | GM&WM | CP | CP ves   | Ependymal |
|                |               |    |    | ves         |         |         |         |          |          |          |         |              |    |    |    |                | ves   |    |          | cells     |
| 1 <sup>a</sup> | 0             | 0  | 1  | 1           | 1       | 1       | 0       | 1        | 1        | 0        | 0       | 1            | 1  | 1  | 0  | 1              | 0     | 0  | 1        | 1         |
| 2 <sup>a</sup> | 1             | 1  | 1  | 1           | 0       | 0       | 0       | 0        | 0        | 0        | 0       | 1            | 1  | 1  | 0  | 1              | 1     | 0  | 1        | 0         |
| 3 <sup>a</sup> | 1             | 1  | 1  | 1           | 2       | 2       | 0       | 2        | 1        | 1        | 1       | 2            | 2  | 2  | 0  | 1              | 0     | 1  | 1        | 1         |
| 4              | 1             | 1  | 1  | 1           | 1       | 1       | 0       | 1        | 0        | 1        | 0       | 1            | 1  | 2  | 0  | 1              | 0     | 1  | 1        | 1         |
| 5              | 1             | 1  | 1  | 1           | 1       | 1       | 1       | 1        | 1        | 0        | 1       | 1            | 2  | 3  | 1  | 1              | 0     | 1  | 1        | 1         |
| 6              | 1             | 1  | 1  | 0           | 2       | 2       | 0       | 1        | 0        | 1        | 0       | 1            | 1  | 1  | 1  | 1              | 0     | 0  | 1        | 1         |
| 7              | 1             | 1  | 1  | 1           | 2       | 2       | 1       | 1        | 1        | 1        | 1       | 1            | 1  | 1  | 0  | 1              | 1     | 1  | 1        | 1         |
| 8              | 1             | 1  | 1  | 1           | 2       | 2       | 0       | 2        | 0        | 1        | 0       | 2            | 1  | 1  | 0  | 1              | 0     | 0  | 1        | 1         |
| 9              | 1             | 1  | 0  | 0           | 2       | 2       | 0       | 1        | 0        | 1        | 0       | 1            | 2  | 1  | 0  | 1              | 0     | 0  | 0        | 0         |
| 10             | 1             | 1  | 0  | 0           | 2       | 2       | 0       | 1        | 0        | 1        | 0       | 1            | 2  | 2  | 0  | 1              | 1     | 0  | 0        | 0         |
| 11             | 1             | 1  | 1  | 1           | 2       | 2       | 0       | 1        | 0        | 1        | 0       | 1            | 2  | 1  | 0  | 1              | 0     | 1  | 1        | 1         |
| 12             | 1             | 1  | 1  | 1           | 2       | 2       | 0       | 1        | 0        | 1        | 0       | 1            | 1  | 2  | 0  | 0              | 0     | 0  | 1        | 1         |
| 13             | 1             | 1  | 1  | 1           | 2       | 2       | 0       | 1        | 0        | 1        | 0       | 2            | 1  | 2  | 0  | 1              | 0     | 0  | 0        | 1         |
| 14             | 1             | 1  | 1  | 1           | 2       | 2       | 0       | 2        | 0        | 1        | 0       | 2            | 2  | 2  | 0  | 1              | 0     | 0  | 0        | 1         |
| 15             | 1             | 2  | 1  | 1           | 2       | 2       | 0       | 2        | 0        | 1        | 0       | 2            | 1  | 1  | 0  | 1              | 0     | 0  | 0        | 1         |
| 16             | 1             | 2  | 1  | 1           | 1       | 1       | 0       | 1        | 1        | 1        | 1       | 1            | 1  | 2  | 1  | 1              | 0     | 1  | 1        | 1         |
| 17             | 2             | 2  | 1  | 1           | 2       | 2       | 1       | 2        | 1        | 1        | 1       | 1            | 2  | 2  | 0  | 1              | 0     | 1  | 1        | 1         |
| 18             | 2             | 2  | 1  | 1           | 2       | 2       | 1       | 2        | 1        | 1        | 1       | 2            | 1  | 2  | 0  | 1              | 0     | 1  | 1        | 1         |
| 19             | 1             | 2  | 1  | 1           | 2       | 2       | 0       | 1        | 1        | 1        | 1       | 2            | 2  | 2  | 0  | 1              | 1     | 1  | 1        | 1         |
| 20             | 1             | 2  | 1  | 1           | 3       | 3       | 1       | 2        | 1        | 2        | 1       | 2            | 3  | 3  | 0  | 1              | 1     | 1  | 1        | 1         |
| 21             | 1             | 3  | 1  | 1           | 2       | 2       | 0       | 2        | 0        | 1        | 0       | 2            | 3  | 3  | 1  | 1              | 0     | 1  | 1        | 1         |
| 22             | 1             | 1  | 1  | 1           | 2       | 2       | 0       | 1        | 0        | 1        | 0       | 2            | 1  | 2  | 0  | 1              | 1     | 1  | 1        | 1         |
| 23             | 3             | 3  | 1  | 1           | 3       | 3       | 1       | 3        | 1        | 2        | 1       | 2            | 3  | 3  | 1  | 1              | 0     | 1  | 1        | 1         |
| 24             | 3             | 3  | 1  | 1           | 3       | 2       | 1       | 3        | 0        | 2        | 0       | 2            | 3  | 3  | 1  | 1              | 0     | 1  | 1        | 1         |
| 25             | 2             | 2  | 1  | 1           | 2       | 2       | 1       | 2        | 1        | 1        | 1       | 2            | 2  | 2  | —  | 1              | 1     | 1  | 1        | 1         |
| 26             | 3             | 2  | 1  | 1           | 3       | 3       | 0       | 3        | 1        | 2        | 1       | 2            | 3  | 3  | 1  | 1              | 0     | 1  | 1        | 1         |
| 27             | 2             | 3  | 1  | 0           | 2       | 2       | 0       | 2        | 0        | 1        | 0       | 2            | 3  | 3  | 1  | 1              | 1     | 1  | 1        | 1         |
| 28             | 2             | 3  | 1  | 1           | 3       | 3       | 1       | 3        | 1        | 2        | 1       | 2            | 2  | 2  | 1  | 1              | 1     | 1  | 1        | 1         |
| 29             | 1             | 3  | 1  | 1           | 3       | 2       | 1       | 3        | 1        | 2        | 1       | 2            | 2  | 3  | 1  | 1              | 0     | 1  | 1        | 1         |
| 30             | 2             | 3  | 1  | 1           | 3       | 2       | 1       | 3        | 1        | 2        | 1       | 2            | 2  | 3  | 1  | 1              | 1     | 1  | 1        | 1         |

\* **ves:** vessels; **Hip:** hippocampus, **Thal:** thalamus; **Str:** striatum; **IC:** internal capsule.

**Table S4.** Grading of GFAP immunolabeling

| Case No | <i>Temporal lobe</i> |    |    | <i>Hippocampus</i> |        |        | <i>Frontal lobe</i> |    |    | <i>Cerebellum</i> |    |    |
|---------|----------------------|----|----|--------------------|--------|--------|---------------------|----|----|-------------------|----|----|
|         | GM                   | WM | GL | Hip GM             | Hip WM | Hip GL | GM                  | WM | GL | GM                | WM | GL |
| 4       | 2                    | 2  | 2  | 2                  | 2      | 2      | 1                   | 1  | 2  | 2                 | 2  | 1  |
| 5       | 3                    | 2  | 1  | 3                  | 2      | 1      | 2                   | 3  | 2  | 2                 | 2  | 2  |
| 6       | 2                    | 2  | 2  | 2                  | 2      | 1      | 2                   | 2  | 2  | 2                 | 2  | 2  |
| 7       | 2                    | 2  | 1  | 2                  | 2      | 2      | 1                   | 2  | 2  | 2                 | 2  | 1  |
| 8       | 2                    | 2  | 1  | 2                  | 2      | 1      | 1                   | 2  | 1  | 2                 | 2  | 1  |
| 9       | 2                    | 2  | 1  | 1                  | 2      | 1      | 1                   | 2  | 1  | 2                 | 2  | 1  |
| 10      | 2                    | 2  | 2  | 2                  | 2      | 1      | 2                   | 2  | 1  | 2                 | 2  | 1  |
| 11      | 2                    | 2  | 2  | 2                  | 2      | 1      | 1                   | 2  | 2  | 2                 | 2  | 1  |
| 12      | 2                    | 2  | 1  | 2                  | 2      | 2      | 1                   | 2  | 1  | 3                 | 2  | 2  |
| 13      | 1                    | 1  | 1  | 1                  | 1      | 2      | 1                   | 2  | 1  | 1                 | 1  | 2  |
| 14      | 1                    | 2  | 2  | 2                  | 2      | 1      | 2                   | 1  | 2  | 1                 | 2  | 1  |
| 15      | 2                    | 2  | 1  | 2                  | 1      | 1      | 2                   | 2  | 1  | 2                 | 2  | 1  |
| 16      | 3                    | 3  | 2  | 1                  | 3      | 2      | 2                   | 2  | 2  | 3                 | 2  | 2  |
| 17      | 2                    | 3  | 2  | 3                  | 2      | 2      | 2                   | 2  | 2  | 2                 | 2  | 2  |
| 18      | 2                    | 3  | 2  | 2                  | 2      | 2      | 2                   | 3  | 2  | 2                 | 2  | 2  |
| 19      | 2                    | 2  | 2  | 2                  | 2      | 2      | 2                   | 2  | 1  | 2                 | 2  | 2  |
| 20      | 3                    | 2  | 2  | 3                  | 2      | 2      | 2                   | 2  | 1  | 3                 | 2  | 2  |
| 21      | 3                    | 3  | 3  | 3                  | 2      | 2      | 3                   | 3  | 2  | 3                 | 2  | 3  |
| 22      | 3                    | 3  | 2  | 2                  | 2      | 2      | 2                   | 2  | 2  | 2                 | 3  | 2  |
| 23      | 3                    | 3  | 3  | 3                  | 3      | 3      | 3                   | 3  | 2  | 3                 | 3  | 3  |
| 24      | 3                    | 3  | 3  | 3                  | 3      | 3      | 3                   | 3  | 3  | 3                 | 3  | 3  |
| 25      | 3                    | 3  | 2  | 3                  | 2      | 2      | 2                   | 2  | 3  | 3                 | 3  | 2  |
| 26      | 3                    | 3  | 3  | 3                  | 3      | 3      | 3                   | 2  | 2  | 3                 | 3  | 3  |
| 27      | 3                    | 3  | 3  | 3                  | 3      | 2      | 3                   | 3  | 2  | 3                 | 3  | 3  |
| 28      | 3                    | 3  | 2  | 3                  | 2      | 2      | 2                   | 3  | 2  | 2                 | 3  | 2  |
| 29      | 2                    | 3  | 2  | 3                  | 2      | 2      | 2                   | 3  | 3  | 3                 | 2  | 2  |
| 30      | 3                    | 3  | 2  | 2                  | 3      | 2      | 3                   | 3  | 3  | 3                 | 3  | 3  |

\* GL: glia limitans; Hip: hippocampus

**Table S5.** Scoring of A $\beta$  immunolabelling in the brain of cats of different ages

| Temporal lobe |                    |            |                       | Hippocampus |             |                 |              | CP                    |                 |          | Frontal lobe |                     |                    |            | Cerebellum |            |                    |            |               |
|---------------|--------------------|------------|-----------------------|-------------|-------------|-----------------|--------------|-----------------------|-----------------|----------|--------------|---------------------|--------------------|------------|------------|------------|--------------------|------------|---------------|
| Case No       | Leptomeningeal CAA | GM+ WM CAA | GM neurons            | GM&W M SPs  | Hip neurons | Hip SPs         | Thal neurons | Thal SPs              | Str neurons     | Str SPs  | CPV          | CP epithelial cells | Leptomeningeal CAA | GM&W M CAA | GM neurons | GM+ WM SPs | Leptomeningeal CAA | GM+ WM CAA | GM&DN neurons |
|               | *p<0,001           | *p<0,001   | *p=0.095 <sup>‡</sup> | *p<0,001    | *p<0,002    | Non-significant | *p<0,029     | *p=0.092 <sup>‡</sup> | Non-significant | *p=0.047 | *p<0,001     | *p<0,001            | *p<0,001           | *p<0,002   | *p=0.021   | *p<0,001   | *p<0,002           | *p<0,001   | *p<0,001      |
| 4             | 1                  | 1          | 0                     | 3           | 1           | 1               | 1            | 0                     | 1               | 0        | 2            | 3                   | 3                  | 3          | 1          | 1          | 0                  | 0          | 0             |
| 5             | 1                  | 1          | 0                     | 3           | 1           | 0               | 1            | 0                     | 1               | 0        | 3            | 2                   | 3                  | 1          | 2          | 1          | 0                  | 0          | 0             |
| 6             | 1                  | 3          | 1                     | 3           | 1           | 0               | 1            | 0                     | 1               | 0        | 3            | 3                   | 3                  | 1          | 2          | 1          | 0                  | 0          | 0             |
| 7             | 2                  | 3          | 1                     | 0           | 1           | 0               | 1            | 0                     | 1               | 0        | 1            | 1                   | 2                  | 2          | 1          | 0          | 3                  | 1          | 1             |
| 8             | 1                  | 1          | 1                     | 0           | 1           | 0               | 1            | 0                     | 0               | 0        | 1            | 1                   | 3                  | 1          | 1          | 0          | 3                  | 3          | 1             |
| 9             | 3                  | 3          | 0                     | 0           | 1           | 0               | 0            | 0                     | 0               | 0        | 1            | 1                   | 2                  | 1          | 1          | 0          | 3                  | 2          | 1             |
| 10            | 1                  | 2          | 1                     | 0           | 1           | 0               | 1            | 0                     | 1               | 0        | 2            | 2                   | 2                  | 3          | 1          | 0          | 1                  | 1          | 1             |
| 11            | 1                  | 1          | 1                     | 0           | 1           | 0               | 1            | 0                     | 1               | 0        | 1            | 2                   | 2                  | 1          | 1          | 0          | 1                  | 1          | 1             |
| 12            | 2                  | 1          | 1                     | 0           | 1           | 0               | 1            | 0                     | 1               | 0        | 2            | 3                   | 2                  | 1          | 1          | 0          | 1                  | 1          | 1             |
| 13            | 2                  | 2          | 1                     | 1           | 1           | 1               | 1            | 0                     | 1               | 0        | 2            | 2                   | 3                  | 1          | 1          | 1          | 3                  | 3          | 1             |
| 14            | 2                  | 3          | 1                     | 1           | 2           | 0               | 1            | 0                     | 1               | 0        | 1            | 2                   | 3                  | 2          | 1          | 1          | 1                  | 3          | 1             |
| 15            | 2                  | 2          | 0                     | 1           | 0           | 0               | 0            | 0                     | 0               | 0        | 1            | 1                   | 1                  | 0          | 0          | 0          | 2                  | 1          | 1             |
| 16            | 3                  | 1          | 0                     | 2           | 0           | 0               | 0            | 0                     | 0               | 0        | 2            | 2                   | 3                  | 2          | 1          | 0          | 2                  | 2          | 1             |
| 17            | 2                  | 3          | 1                     | 3           | 2           | 0               | 1            | 0                     | 1               | 0        | 2            | 2                   | 3                  | 3          | 1          | 1          | 1                  | 1          | 1             |
| 18            | 2                  | 1          | 1                     | 3           | 2           | 0               | 1            | 3                     | 2               | 1        | 2            | 3                   | 2                  | 2          | 2          | 3          | 0                  | 0          | 0             |
| 19            | 2                  | 1          | 1                     | 2           | 2           | 1               | 1            | 0                     | 0               | 0        | 2            | 3                   | 2                  | 3          | 1          | 1          | 1                  | 1          | 1             |
| 20            | 2                  | 2          | 0                     | 2           | 2           | 0               | 1            | 0                     | 1               | 1        | 2            | 2                   | 3                  | 2          | 1          | 2          | 2                  | 2          | 1             |
| 21            | 1                  | 1          | 0                     | 3           | 1           | 1               | 1            | 3                     | 1               | 3        | 3            | 3                   | 3                  | 1          | 1          | 3          | 3                  | 3          | 1             |
| 22            | 2                  | 1          | 1                     | 1           | 1           | 0               | 1            | 0                     | 1               | 0        | 1            | 2                   | 3                  | 1          | 1          | 0          | 1                  | 1          | 1             |
| 23            | 3                  | 3          | 1                     | 3           | 2           | 1               | 1            | 2                     | 1               | 2        | 3            | 3                   | 3                  | 3          | 2          | 3          | 3                  | 2          | 1             |
| 24            | 2                  | 1          | 1                     | 3           | 2           | 1               | 1            | 2                     | 1               | 1        | 2            | 3                   | 3                  | 3          | 1          | 3          | 2                  | 2          | 1             |
| 25            | 1                  | 1          | 0                     | 3           | 0           | 0               | 0            | 3                     | 0               | 1        | 2            | 2                   | 3                  | 1          | 1          | 3          | 1                  | 2          | 1             |
| 26            | 1                  | 1          | 0                     | 3           | 2           | 0               | 1            | 3                     | 1               | 0        | 3            | 3                   | 3                  | 2          | 1          | 3          | 3                  | 2          | 1             |
| 27            | 1                  | 1          | 0                     | 3           | 1           | 3               | 1            | 1                     | 1               | 2        | 1            | 3                   | 2                  | 1          | 0          | 3          | 3                  | 3          | 2             |
| 28            | 1                  | 1          | 0                     | 3           | 1           | 1               | 0            | 0                     | 0               | 1        | 1            | 2                   | 3                  | 2          | 1          | 3          | 2                  | 2          | 1             |
| 29            | 1                  | 1          | 0                     | 3           | 0           | 2               | 0            | 0                     | 0               | 3        | 2            | 2                   | 2                  | 2          | 0          | 3          | 3                  | 3          | 2             |
| 30            | 2                  | 1          | 0                     | 3           | 2           | 3               | 1            | 0                     | 1               | 0        | 3            | 3                   | 3                  | 2          | 1          | 3          | 2                  | 2          | 1             |

\* ves: vessels; **Hip**: hippocampus, **Thal**: thalamus; **Str**: striatum.

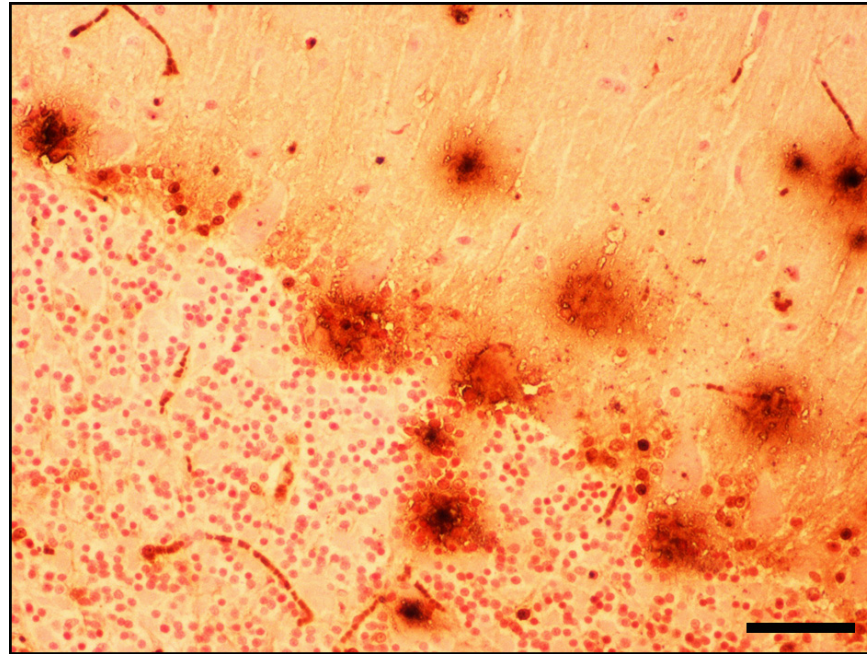

**Figure S1.** Condensed plaques characterized by spherical accumulation of iron with dense core and diffuse, poorly delimited IPs. Neurons and glial cells are also stained. Perl's/DAB. Bar=50 $\mu$ m
